# Supplementary material for: Effect of Biochar Types and Rates on SOC and Its Active Fractions in Tropical Farmlands of China
Source: MDPI journal article supplement (doi:10.3390/agronomy14040676), 2024-03-26
Supplement: s1 [file s1]

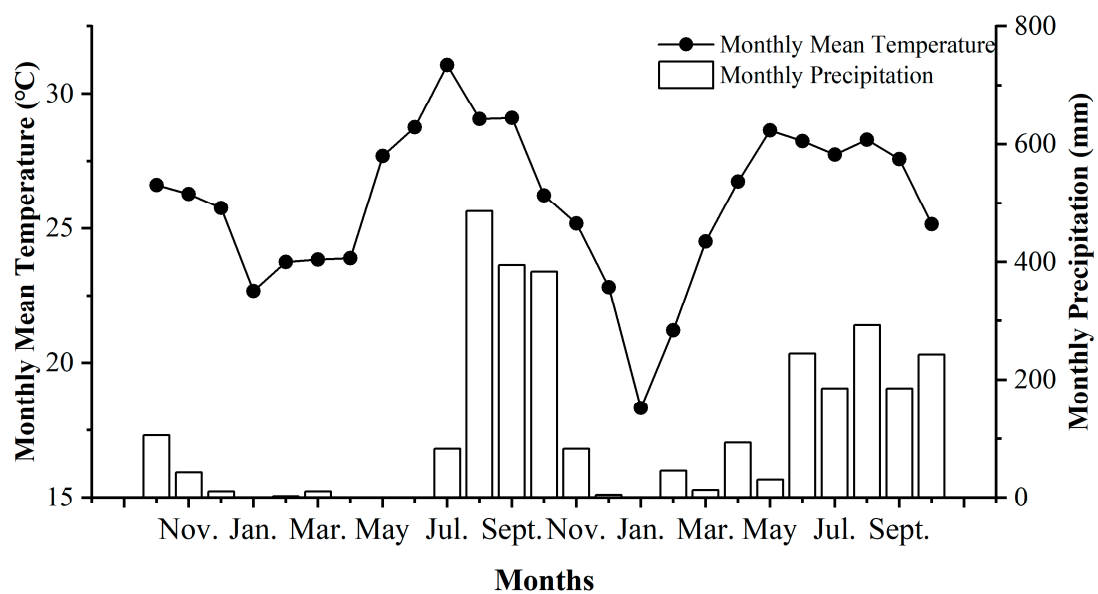

**Figure S1** The monthly mean temperature and monthly precipitation in the experimental site across the two years after the biochar application (from October 2019 to October 2021).

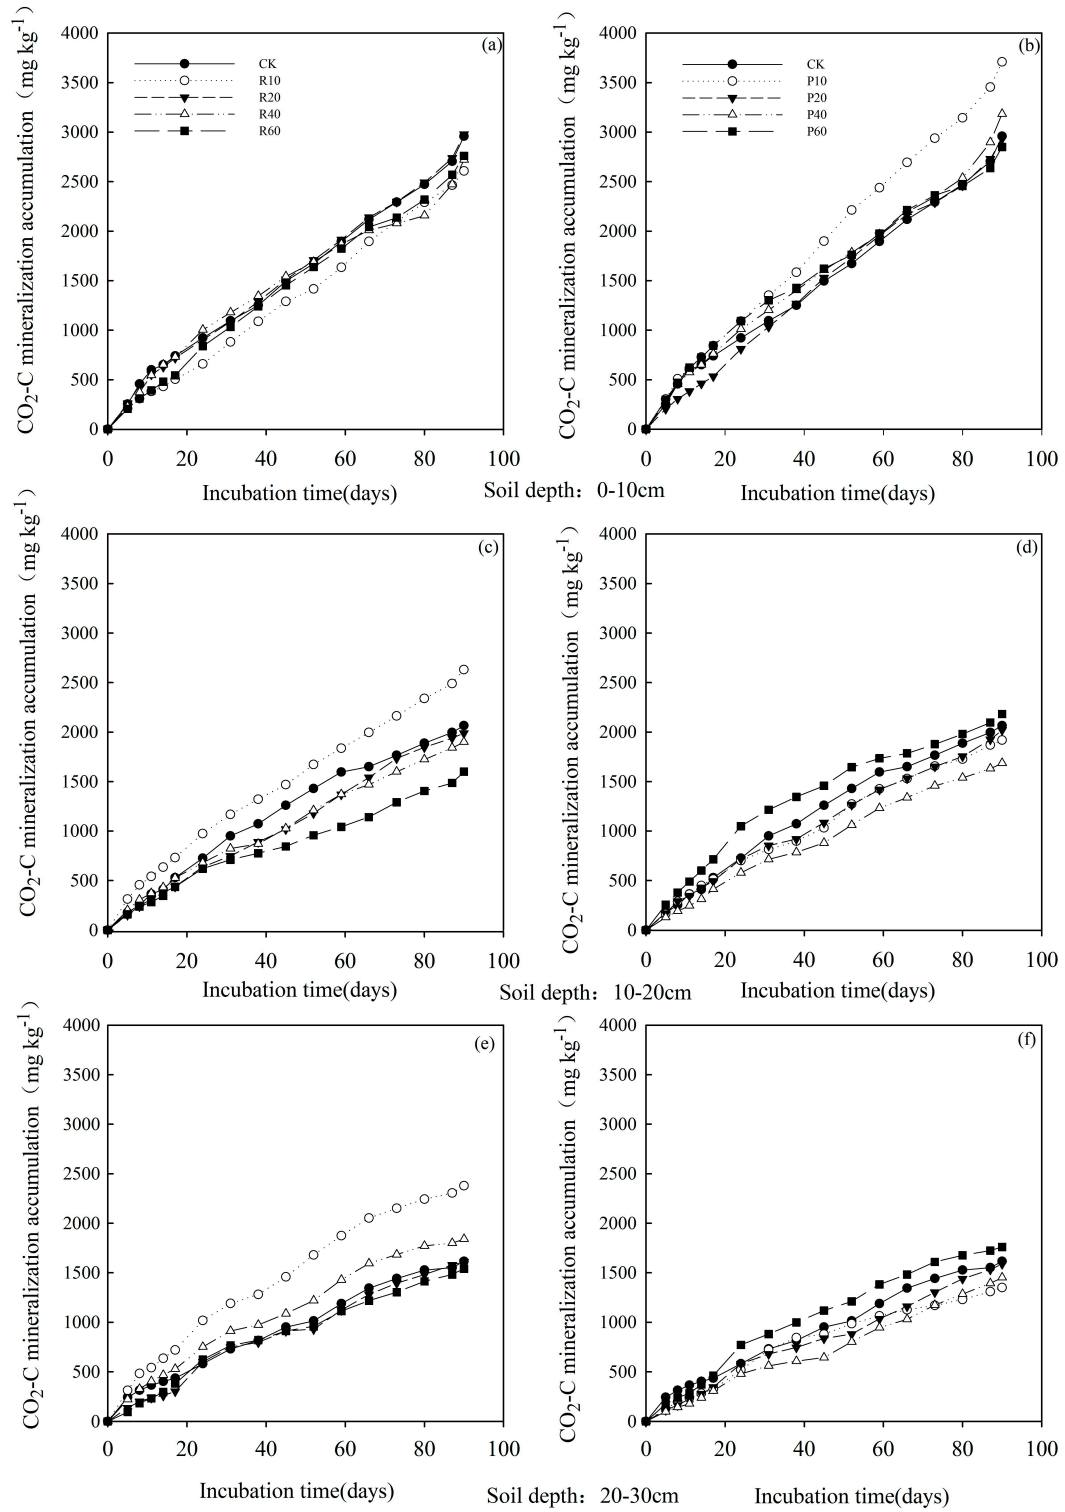

**Figure S2** The dynamics of cumulative  $\text{CO}_2\text{-C}$  mineralization in dry red soil under different biochar applications. R10, R20, R40 and R60 indicate that the biomass applied to rice hull is  $10 \text{ t ha}^{-1}$ ,  $20 \text{ t ha}^{-1}$ ,  $40 \text{ t ha}^{-1}$  and  $60 \text{ t ha}^{-1}$ , respectively; P10, P20, P40 and P60 indicate that the biomass of peanut shell is  $10 \text{ t ha}^{-1}$ ,  $20 \text{ t ha}^{-1}$ ,  $40 \text{ t ha}^{-1}$  and  $60 \text{ t ha}^{-1}$ , respectively; CK: no biochar.

**Table S1** Contribution rate of soil physicochemical indicators and enzyme activity to active carbon fractions and carbon stability.

| Index | Contribution (%) | Significance |
|-------|------------------|--------------|
| Suc   | 50.7             | **           |
| AK    | 27.6             | **           |
| MC    | 7.7              | **           |
| A pho | 7                | **           |
| Cat   | 2.1              | *            |
| TN    | 1.5              | NS           |
| BD    | 1.4              | NS           |
| TP    | 0.8              | NS           |
| AP    | 0.8              | NS           |
| Ure   | 0.7              | NS           |
| pH    | 0.6              | NS           |

\*Significantly represented; \*\* Significantly represented; NS represents insignificant. MC, soil moisture content; BD, soil bulk density; SOC, soil organic carbon; TN, total nitrogen; TP, total phosphorus; AP, available phosphorus; AK, available potassium. Suc, sucrase activity; Ure, urease activity; A Pho, acid phosphatase activity; Cat, catalase activity;
